# Supplementary material for: Subsistence strategies in traditional societies distinguish gut microbiomes
Source: PubMed Central journal article supplement (PMC4386023; doi:10.1038/ncomms7505), 2015-03-25
Supplement: NIHMS661622-supplement-1.pdf [file NIHMS661622-supplement-1.pdf]

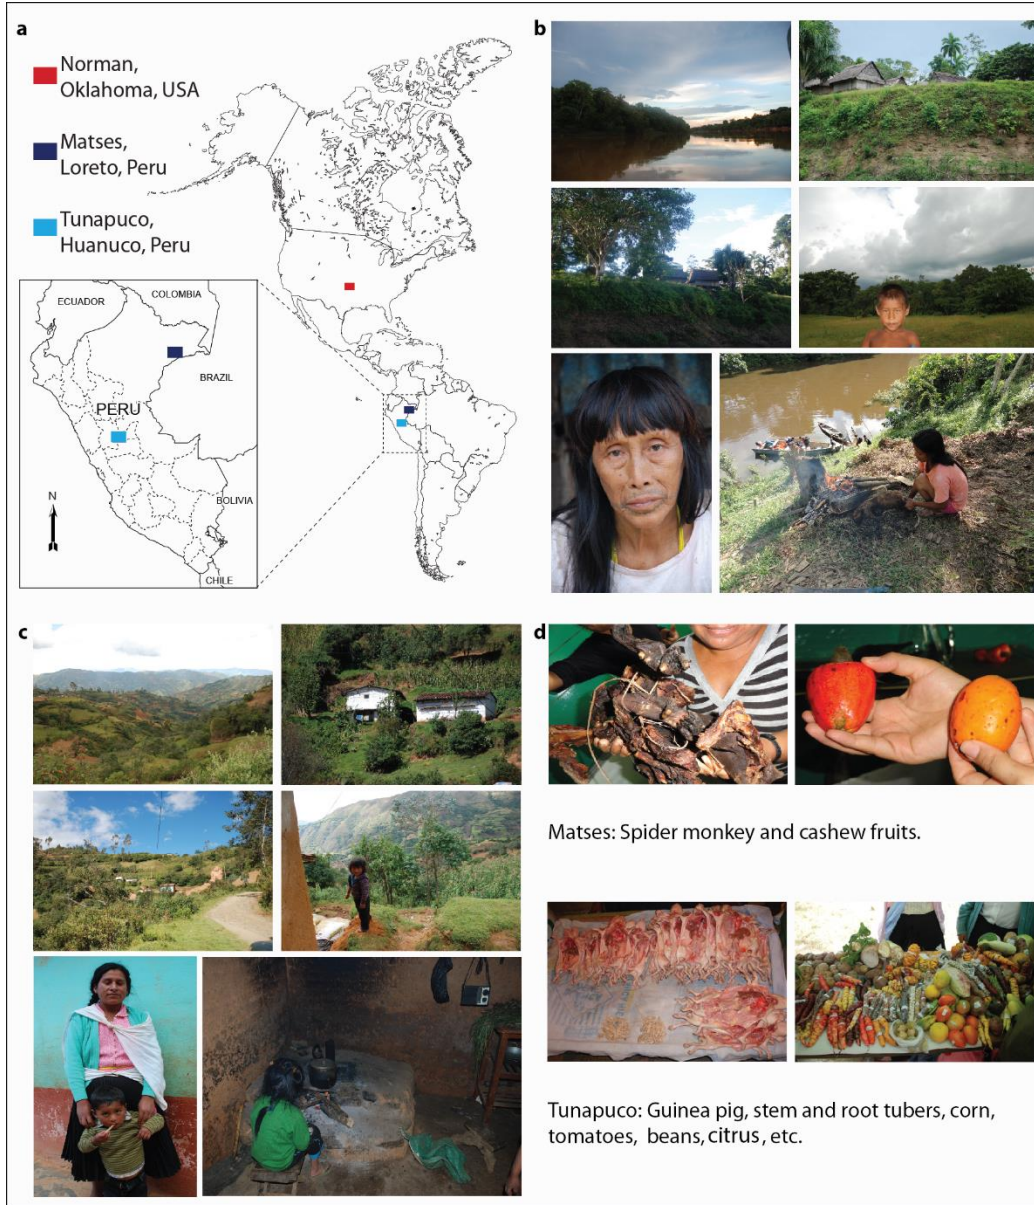

**Supplementary Figure 1 | Geography and lifestyle of the Matses and Tunapuco traditional Peruvian human populations.** (a) Map showing the populations represented in this study. (b) The Matses community of San Mateo is composed of 14 hunter-gatherer families settled close together along the Peruvian Amazon River at 150 meters above the sea level (masl). (c) Tunapuco is an agricultural community composed of numerous families spread over a large area in the Central Andes region, with one to two family units occupying each hill at a variety of elevations ranging from 2500-3100 masl. (d) The Matses and Tunapuco diets are based on local resources, but have distinct faunal and floral composition. Our control Western population is a community of university-associated residents living in Norman, Oklahoma (357 masl).

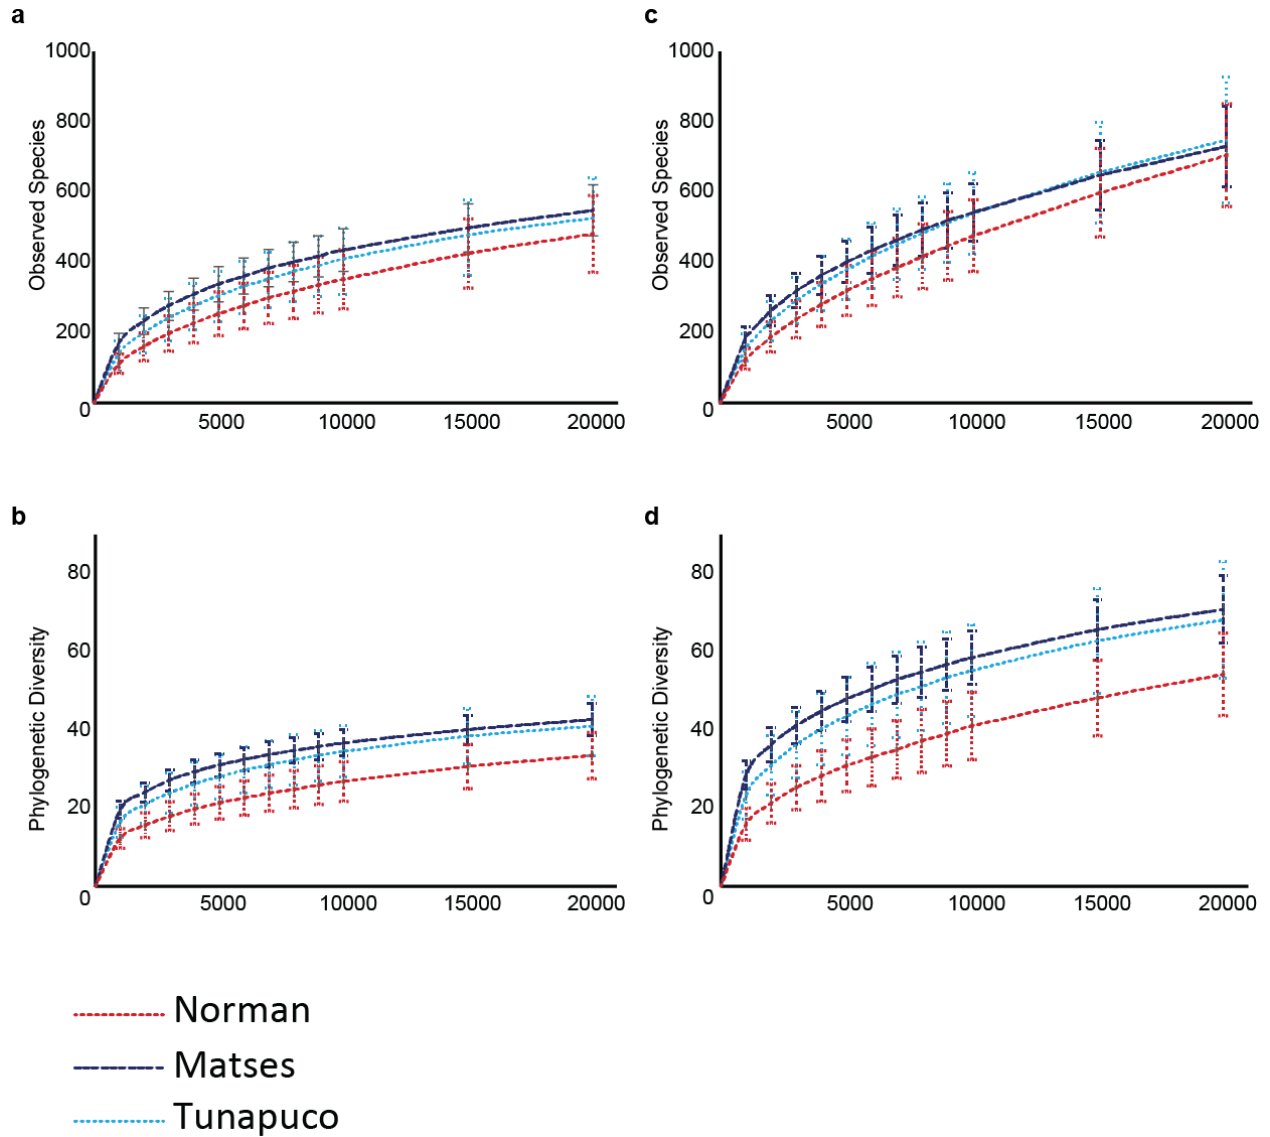

**Supplementary Figure 2| Rarefaction curves for gut microbiome richness estimates in the three study populations.** Rarefaction curves were generated using both closed reference (a, b) and open reference (c, d) OTU tables, and were calculated with non-phylogenetic (a, c) and phylogenetic (b, d) metrics. Note that the differences among the three populations are greatest when analyzed with respect to phylogenetic diversity. Horizontal and vertical axes represent rarefaction depth and alpha diversity values respectively. Error bars correspond to standard deviation for alpha diversity values within a population at each rarefaction depth.

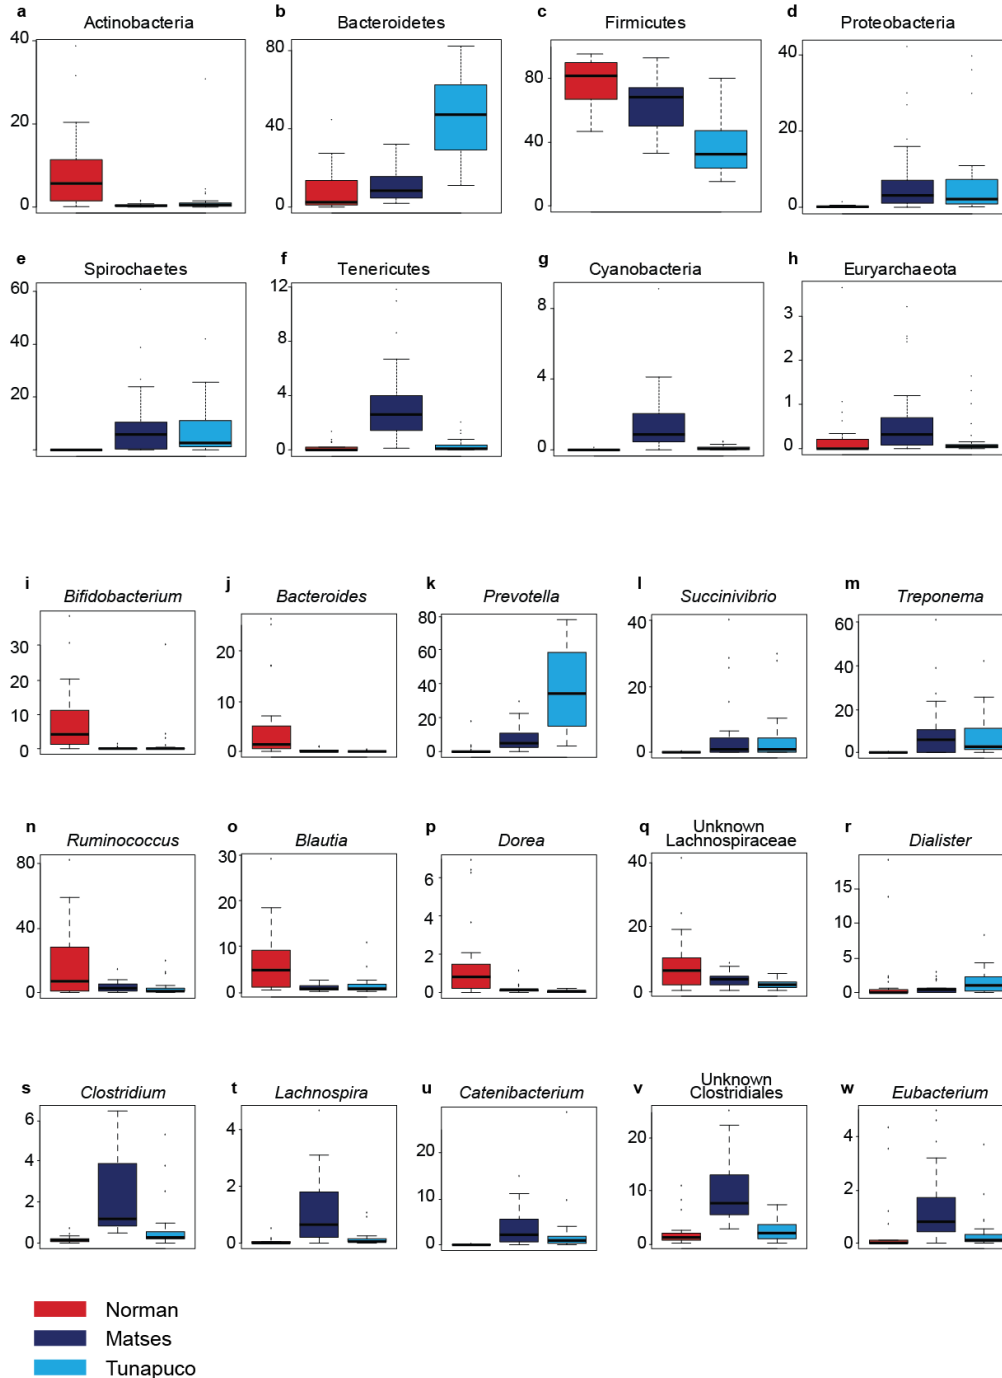

**Supplementary Figure 3| Boxplots for taxa exhibiting significantly different (Kruskal-Wallis, FDR-adjusted  $P < 0.05$ ) relative abundances among the three study populations with respect to phylum (a-h) and genus (i-w). The vertical axis represents relative abundance in percentage. Whiskers in the boxplot represent the range of minimum and maximum values within a population, excluding outliers.**

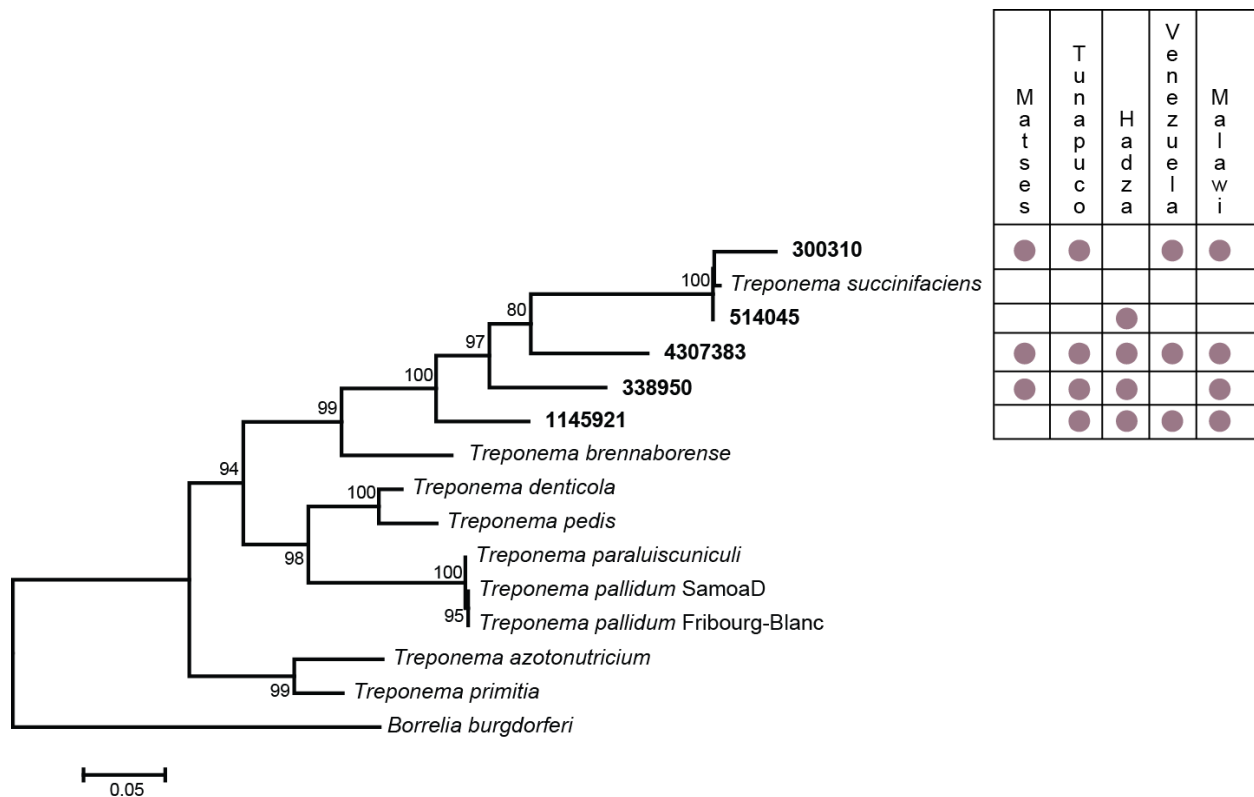

**Supplementary Figure 4| Maximum likelihood tree illustrating the phylogenetic position of human gut-microbiome associated *Treponema* OTUs.** Among Spirochaetes, human-associated gut treponemes form a distinct clade that also includes *T. succinifaciens*, a swine-associated gut treponeme, but which is distinct from insect-associated gut treponemes (*T. azotonutricium*, *T. primitia*), dermatitis-associated treponemes in cattle (*T. brennaborensis*, *T. pedis*), human oral treponemes (*T. denticola*), and other pathogenic Spirochaetes (*T. pallidum*, *B. burgdorferi*). To date, a total of 5 human gut treponeme OTUs have been identified, and their occurrence (presence/absence) in diverse human populations is indicated by shaded circles. Note that OTUs 300310 and 514045 may represent the same organism, which is very closely related to *T. succinifaciens*. Bootstrap values above 80% (generated from 1,000 replicates) are indicated on the tree.

**Supplementary Table 1. Summary of the Matses diet.** Nutritional data was collected using a food frequency questionnaire. Respondents generally stated that their diet is dependent upon availability. Plantain and manioc, which are rudimentarily cultivated in small plots around their settlement, are the only constants in the Matses diet, with six or more portions consumed each day. Similar to other Amazonian groups, fish appears to be their main source of protein, supplemented by other wild game, such as monkey, and sloth.

|                                      |                   |                              |                     |                    |                                           | Nutritional content (per 100 g)                                                                                                                    |      |               |      |
|--------------------------------------|-------------------|------------------------------|---------------------|--------------------|-------------------------------------------|----------------------------------------------------------------------------------------------------------------------------------------------------|------|---------------|------|
|                                      |                   |                              |                     |                    |                                           | Protein                                                                                                                                            | Fat  | Carbohydrates |      |
|                                      | Matses name       | Common name                  | Scientific name     | Frequency          | Mode of consumption                       |                                                                                                                                                    |      |               |      |
| Staple food, main source of calories | Pachid ushu       | Varieties of manioc          | <i>Manihot</i> spp. | Everyday / anytime | Boiled                                    | 0.48                                                                                                                                               | 0.1  | 31            |      |
|                                      | Pachid piu        |                              |                     |                    | Drink (Masato)                            | 0.2                                                                                                                                                | 0.1  | 8.9           |      |
|                                      | Pachid tau chëshë |                              |                     |                    | Fermented and toasted (farina)            | No data available. It is estimated that 45% of protein and sucrose is lost during fermentation. Starch digestibility is increased by fermentation. |      |               |      |
|                                      | Mani              | Varieties of plantain/banana | <i>Musa</i> spp.    |                    | Raw (average of varieties)                | 1.2                                                                                                                                                | 0.27 | 25            |      |
|                                      | Mani bënë         |                              |                     |                    | Chapo (main drink, accompanies all meals) | Approximately a third of the nutritional content of raw banana (volumetric dilution)                                                               |      |               |      |
|                                      | Manimbo           |                              |                     |                    |                                           | Boiled                                                                                                                                             | 0.7  | 0.3           | 36.8 |
|                                      | Mani chëshë       |                              |                     |                    | grilled                                   |                                                                                                                                                    | 1.5  | 0.2           | 68   |
|                                      | Mani ushu         |                              |                     |                    |                                           |                                                                                                                                                    |      |               |      |
|                                      | Mani chotac       |                              |                     |                    |                                           |                                                                                                                                                    |      |               |      |
|                                      | Mani masquë       |                              |                     |                    |                                           |                                                                                                                                                    |      |               |      |
|                                      | Mani macho        |                              |                     |                    |                                           |                                                                                                                                                    |      |               |      |
|                                      | Mani piu          |                              |                     |                    |                                           |                                                                                                                                                    |      |               |      |
| Mani tadan                           |                   |                              |                     |                    |                                           |                                                                                                                                                    |      |               |      |

**Supplementary Table 1 (cont.) Summary of the Matses diet**

|             |                   |                                                                                                                  |                             |                           |                         | Nutritional content (per 100 g) |     |               |
|-------------|-------------------|------------------------------------------------------------------------------------------------------------------|-----------------------------|---------------------------|-------------------------|---------------------------------|-----|---------------|
|             | Matses name       | Common name                                                                                                      | Scientific name             | Frequency                 | Mode of consumption     | Protein                         | Fat | Carbohydrates |
| Other crops | Cadi piu          | Sweet potato                                                                                                     | <i>Ipomoea batata</i>       | Couple times a month      | Boiled, grilled         | 1.6                             | 0.2 | 26.1          |
|             | Cadi chëshë       |                                                                                                                  |                             |                           |                         |                                 |     |               |
|             | Piacbo            | Maize                                                                                                            | <i>Zea mays</i>             | Monthly                   | Boiled, grilled         | 3.3                             | 0.8 | 27.8          |
|             | Piacbo bëdi       |                                                                                                                  |                             |                           |                         |                                 |     |               |
|             | Chotacquëna bëaid | Guaba, orange, mangoes. Lemon, grapefruit, rice, cacao, etc. Any crop that is brought from outside the community | various                     | Sometimes, when available | Various                 | NA                              | NA  | NA            |
| Mammals     | Poshto            | Woolly monkey                                                                                                    | <i>Lagothrix lagotricha</i> | Few times a month         | Grilled, smoked, boiled | NA                              | NA  | NA            |
|             | Achu              | Howler monkey                                                                                                    | <i>Alouatta seniculus</i>   |                           |                         | NA                              | NA  | NA            |
|             | Shuinte           | Sloth                                                                                                            | <i>Bradypus sp</i>          |                           |                         | NA                              | NA  | NA            |
|             | Shëshëid          | Spider monkey                                                                                                    | <i>Ateles sp</i>            |                           |                         | NA                              | NA  | NA            |
|             | Shëcten           | Collared peccary                                                                                                 | <i>Tayassu tajacu</i>       |                           |                         | 85.6                            | NA  | NA            |
|             | Shëctenamë        | White-lipped peccary                                                                                             | <i>Tayassu pecari</i>       |                           |                         | 84.6                            | NA  | NA            |

**Supplementary Table 1 (cont.) Summary of the Matses diet**

|          |                |                             |                                 |                        |                                                      | Nutritional content (per 100 g) |      |               |
|----------|----------------|-----------------------------|---------------------------------|------------------------|------------------------------------------------------|---------------------------------|------|---------------|
|          | Matses name    | Common name                 | Scientific name                 | Frequency              | Mode of consumption                                  | Protein                         | Fat  | Carbohydrates |
| Reptiles | Piush          | Yellow-footed tortoise      | <i>Geochelone denticulata</i>   | Few times a month      | Grilled, smoked, boiled                              | 84.4                            | NA   | NA            |
|          | Zeta           | Yellow-spotted river turtle | <i>Podocnemis unifilis</i>      |                        |                                                      | NA                              | NA   | NA            |
| Birds    | Cushu          | Trinidad piping guan        | <i>Aburria pipile</i>           | Few times a month      | Grilled, smoked, boiled                              | NA                              | NA   | NA            |
|          | Mando          | Grey-winged trumpeter       | <i>Psophia sp</i>               |                        |                                                      | NA                              | NA   | NA            |
|          | Uesnid         | Razor-billed Curassow       | <i>Mitu tuberosa</i>            |                        |                                                      | NA                              | NA   | NA            |
| Fish     | Sabalo (*)     | Sabalo                      | <i>Prochilodus lineatus</i>     | Daily/Few times a week | boiled, grilled or cooked inside leaves (Patarashca) | NA                              | NA   | NA            |
|          | Maparate (*)   | Maparate                    | <i>Hypophthalmus marginatus</i> |                        |                                                      | 15.1                            | 0.9  | NA            |
|          | Lisa (*)       | Leaping mullet              | <i>Liza saliens</i>             |                        |                                                      | 20.8                            | 3.3  | 0             |
|          | Tucunare (*)   | Tucunare peacock bass       | <i>Cichla monocullus</i>        |                        |                                                      | NA                              | NA   | NA            |
|          | Boquichico (*) | Black prochilodus           | <i>Prochilodus nigricans</i>    |                        |                                                      | 47.9                            | 9.1  | 0             |
| Eggs     |                | Turtle, alligator           |                                 | Irregular.             | (Average values)                                     | 15.1                            | 11.3 | 2.9           |

**Supplementary Table 2. Summary of the Tunapuco diet.** Nutritional data was collected using a food frequency questionnaire.

|                                      | Common name    | English description | Scientific name          | Frequency                        | Mode of consumption | Nutritional content (per 100 g) |     |               |
|--------------------------------------|----------------|---------------------|--------------------------|----------------------------------|---------------------|---------------------------------|-----|---------------|
|                                      |                |                     |                          |                                  |                     | Protein                         | Fat | Carbohydrates |
| Staple food, main source of calories | Papa           | Potato              | <i>Solanum tuberosa</i>  | Everyday / anytime               | Boiled              | 2.1                             | 0.1 | 22.3          |
|                                      | Chuno, Tunta   | Dehydrated potatos  |                          |                                  | Boiled              | 1.9                             | 0.5 | 77.7          |
|                                      | Oca            | Andean tuber        | <i>Oxalis tuberosa</i>   |                                  | Boiled              | 1                               | 0.6 | 13.3          |
|                                      | Pan andino     | Artisan Bread       | -                        |                                  | Oven cooked         | 9.6                             | 0.3 | 71.8          |
|                                      | Mote           | Hominy              | <i>Zea mays</i>          |                                  | Boiled              | 5.9                             | 2.1 | 78.3          |
|                                      | Arroz          | Rice                | <i>Oryza sativa</i>      | Daily/a few times a week         | Boiled              | 7.8                             | 0.7 | 77.6          |
|                                      | Tocosh de papa | Fermented potatoes  | <i>Solanum tuberosa</i>  | Daily                            | Boiled              | NA                              |     |               |
|                                      | Ajos           | Garlic              | <i>Allium sativum</i>    | Few times a week                 | Fried/boiled        | 5.6                             | 0.8 | 30.4          |
|                                      | Zanahoria      | Carrots             | <i>Daucus carota</i>     |                                  | Boiled              | 2.4                             | 0.3 | 8.1           |
|                                      | Col            | Cabagges            | <i>Brassica oleracea</i> |                                  | Boiled/Stewed       | 1.5                             | 0.3 | 4.9           |
|                                      | Habas          | Faba beans          | <i>Vicia faba</i>        |                                  | Boiled              | 11.3                            | 0.8 | 25.9          |
| Fruits                               | Manzana        | Apple               | <i>Malus domestica</i>   | A few of these a week (Seasonal) | Raw                 | 0.3                             | 0.1 | 14.6          |
|                                      | Naranja        | Orange              | <i>Citrus sinensis</i>   |                                  | Raw                 | 0.6                             | 0.2 | 10.1          |
|                                      | Pepino         | Melon pear          | <i>Solanum muricatum</i> |                                  | Raw                 | 0.3                             | 0   | 7             |
|                                      | Mandarina      | Tangerine           | <i>Citrus reticulata</i> |                                  | Raw                 | 0.6                             | 0.3 | 8.6           |
|                                      | Platano        | banana              | <i>Musa paradisiaca</i>  |                                  | Raw                 | 1.5                             | 0.3 | 21            |
|                                      | Mango          | Mango               | <i>Mangifera indica</i>  |                                  | Raw                 | 0.4                             | 0.2 | 15.9          |
|                                      | Piña           | Pineapple           | <i>Ananas comosus</i>    |                                  | Raw                 | 0.4                             | 0.2 | 9.8           |
|                                      | Papaya         | Papaya              | <i>Carica papaya</i>     |                                  | Raw                 | 0.4                             | 0.1 | 8.2           |



Supplementary Table 2 (cont.) Summary of the Tunapuco diet

|         |                      |                     |                                 |                     |                     | Nutritional content (per 100 g) |      |               |
|---------|----------------------|---------------------|---------------------------------|---------------------|---------------------|---------------------------------|------|---------------|
|         | Common name          | English description | Scientific name                 | Frequency           | Mode of consumption | Protein                         | Fat  | Carbohydrates |
| Mammals | Cuy                  | Guinea Pig          | <i>Cavia porcellus</i>          | Biweekly            | Boiled/Stewed/Fried | 19                              | 1.6  | 0.1           |
|         | Vaca                 | Beef                | <i>Bos taurus</i>               | Monthly             | Boiled/Stewed       | 21.3                            | 1.6  | 0             |
|         | Chancho              | Pork                | <i>Sus scrofa domesticus</i>    | Biweekly            | Boiled/Stewed/Fried | 14.4                            | 15.1 | 0.1           |
|         | Carnero              | Sheep               | <i>Ovis aries</i>               | Couple times a week | Boiled/Stewed/Fried | 16.9                            | 21.6 | 0             |
| Birds   | Pollo/gallina        | Chicken/hen         | <i>Gallus gallus domesticus</i> | Weekly              | Boiled/Stewed/Fried | 21.4                            | 3.1  | 0             |
|         | Huevos de gallina    | Eggs                |                                 | Variable, biweekly  | Boiled              | 12.9                            | 8.4  | 1.9           |
| Fish    | Jurel                | Horse mackerel      | <i>Trachurus murphyi</i>        | Seasonal            | Fried               | 19.7                            | 4    | 0.1           |
|         | Trucha               | Rainbow trout       | <i>Oncorhynchus mykiss</i>      | Monthly             | Stewed/Fried        | 19.5                            | 3.1  | 0             |
| Diary   | Leche fresca de vaca | Natural fresh milk  |                                 | Weekly              | Raw/Boiled          | 3.1                             | 3.5  | 4.8           |
|         | Queso Fresco de vaca | Fresh white cheese  |                                 | Weekly              | Raw/added to dishes | 15.8                            | 17.5 | 2.2           |

Supplementary Table 2 (cont.) Summary of the Tunapuco diet

|                       |                 |                       |                                          |                                |                                            | Nutritional content (per 100 g)              |     |               |
|-----------------------|-----------------|-----------------------|------------------------------------------|--------------------------------|--------------------------------------------|----------------------------------------------|-----|---------------|
|                       |                 |                       |                                          |                                |                                            | Protein                                      | Fat | Carbohydrates |
| Store bought products | Common name     | English description   | Scientific name                          | Frequency                      | Mode of consumption                        |                                              |     |               |
|                       | Avena           | Oatmeal               | <i>Avena Sativa</i>                      | Weekly                         | Boiled                                     | 1.3                                          | 0.5 | 10.9          |
|                       | Fideos          | Pasta                 |                                          | Twice a week                   | Boiled                                     | 9.4                                          | 0.2 | 78.2          |
|                       | Azucar          | Sugar                 | <i>Industrial sucrose</i>                | Weekly                         | Added to oatmeal, tea, coffee at breakfast | 0                                            | 0   | 99.1          |
|                       | Pimienta        | Black Pepper          | <i>Piper nigrum</i>                      | Sparsely used                  | Seasoning                                  | Minute quantities, No contribution to energy |     |               |
|                       | Comino          | Cumin                 | <i>Cuminum cyminum</i>                   |                                | Seasoning                                  |                                              |     |               |
|                       | Leche evaporada | Canned condensed milk |                                          | Weekly                         | Diluted with hot water                     | 7                                            | 8.1 | 10.9          |
| Aceite                | Cooking oil     |                       | Very small quantities a few times a week | To fry garlic or some proteins | 0                                          | 100                                          | 0   |               |

**Supplementary Table 3. Participant metadata.** De-identified information includes sample IDs, age, sex, body mass index (BMI), BMI class, and types of analyses performed. BMI was calculated according to the formula  $BMI=W/H^2$ , where ‘W’ is weight in Kilograms, and ‘H’ is height in meters. Sample IDs listed here are concordant with the labels used in 16S rRNA and shotgun datasets.

| Sample | Population | Age | Sex    | BMI   | BMI Class   | 16S rRNA | Shotgun Metagenome | Read Depth 16S | Read Depth Shotgun |           |
|--------|------------|-----|--------|-------|-------------|----------|--------------------|----------------|--------------------|-----------|
|        |            |     |        |       |             |          |                    |                | Paired             | Single    |
| HCO01  | Tunapuco   | 36  | Female | 17.85 | Underweight | Yes      | No                 | 25,890         | NA                 |           |
| HCO02  | Tunapuco   | 9   | Female | 14.05 | Healthy     | Yes      | Yes                | 29,142         | 3,046,571          | 342,289   |
| HCO03  | Tunapuco   | 6   | Male   | 15.68 | Healthy     | Yes      | No                 | 19,922         | NA                 |           |
| HCO04  | Tunapuco   | 4   | Male   | 16.16 | Healthy     | Yes      | No                 | 26,615         |                    |           |
| HCO07  | Tunapuco   | 3   | Female | 19.67 | Obese       | Yes      | Yes                | 28,915         | 5,411,239          | 817,165   |
| HCO09  | Tunapuco   | 13  | NA     | 18.77 | Healthy     | Yes      | Yes                | 32,715         | 5,212,204          | 477,186   |
| HCO10  | Tunapuco   | 10  | Male   | 19.43 | Overweight  | Yes      | No                 | 28,935         |                    |           |
| HCO11  | Tunapuco   | 36  | Male   | 23.05 | Healthy     | Yes      | Yes                | 106,266        | 4,990,441          | 644,918   |
| HCO12  | Tunapuco   | 35  | Female | 27.01 | Overweight  | Yes      | Yes                | 19,869         | 4,674,029          | 677,003   |
| HCO13  | Tunapuco   | 9   | Female | 18.12 | Healthy     | Yes      | No                 | 175,400        | NA                 |           |
| HCO14  | Tunapuco   | 34  | Female | 31.97 | Obese       | Yes      | No                 | 86,378         |                    |           |
| HCO15  | Tunapuco   | 63  | Female | 25.11 | Healthy     | Yes      | No                 | 170,387        |                    |           |
| HCO16  | Tunapuco   | 11  | NA     | 17.70 | Healthy     | Yes      | No                 | 180,819        |                    |           |
| HCO17  | Tunapuco   | 7   | Female | 14.65 | Healthy     | Yes      | No                 | 179,419        |                    |           |
| HCO18  | Tunapuco   | 11  | Male   | 19.68 | Healthy     | Yes      | No                 | 220,801        |                    |           |
| HCO21  | Tunapuco   | 10  | Male   | 17.47 | Healthy     | Yes      | No                 | 165,947        |                    |           |
| HCO41  | Tunapuco   | 54  | NA     | 25.45 | Overweight  | Yes      | No                 | 263,049        |                    |           |
| HCO53  | Tunapuco   | 44  | Female | 29.52 | Overweight  | Yes      | Yes                | 19,010         | 3,400,837          | 2,001,102 |
| HCO61  | Tunapuco   | 20  | Female | NA    | NA          | Yes      | Yes                | 115,066        | 6,056,934          | 867,376   |
| HCO62  | Tunapuco   | NA  | Male   | 50.51 | Obese       | Yes      | No                 | 160,478        | NA                 |           |
| HCO63  | Tunapuco   | 6   | Female | 24.37 | Obese       | Yes      | No                 | 249,229        |                    |           |
| HCO64  | Tunapuco   | NA  | Female | NA    | NA          | Yes      | Yes                | 31,265         | 6,653,729          | 735,161   |

**Supplementary Table 3 (cont.) Participant metadata.**

| Sample | Population | Age | Sex    | BMI   | BMI Class   | 16s rRNA | Shotgun Metagenome | Read Depth 16S | Read Depth Shotgun |           |
|--------|------------|-----|--------|-------|-------------|----------|--------------------|----------------|--------------------|-----------|
|        |            |     |        |       |             |          |                    |                | Paired             | Single    |
| HCO65  | Tunapuco   | NA  | Female | NA    | NA          | Yes      | No                 | 25,429         | NA                 |           |
| HCO66  | Tunapuco   | 11  | Male   | 17.33 | Healthy     | Yes      | No                 | 37,801         | NA                 |           |
| HCO67  | Tunapuco   | 26  | Female | 19.53 | Healthy     | Yes      | Yes                | 33,269         | 5,597,578          | 840,511   |
| HCO68  | Tunapuco   | 7   | Male   | 16.57 | Healthy     | Yes      | No                 | 211,072        | NA                 |           |
| HCO69  | Tunapuco   | 9   | NA     | 18.55 | Healthy     | Yes      | No                 | 98,768         | NA                 |           |
| HCO70  | Tunapuco   | 40  | Female | NA    | NA          | Yes      | Yes                | 134,329        | 6,698,447          | 761,803   |
| HCO72  | Tunapuco   | 5   | Female | 20.36 | Obese       | Yes      | Yes                | 209,579        | 3,513,166          | 3,183,823 |
| HCO73  | Tunapuco   | NA  | Female | NA    | NA          | Yes      | No                 | 177,601        | NA                 |           |
| HCO74  | Tunapuco   | 36  | Female | 31.53 | Obese       | Yes      | Yes                | 144,051        | 6,025,093          | 563,713   |
| SM01   | Matses     | 30  | Male   | NA    | NA          | Yes      | Yes                | 96,773         | 35,415,317         | 4,290,766 |
| SM02   | Matses     | 25  | Female | 23.95 | Healthy     | Yes      | Yes                | 89,370         | 45,077,030         | 4,730,237 |
| SM03   | Matses     | 10  | Male   | 15.77 | Healthy     | Yes      | Yes                | 108,481        | 22,223,170         | 2,499,433 |
| SM05   | Matses     | 1   | Male   | NA    | NA          | Yes      | Yes                | 97,170         | 23,064,470         | 2,912,751 |
| SM10   | Matses     | 6   | Female | 17.82 | Healthy     | Yes      | No                 | 86,656         | NA                 |           |
| SM11   | Matses     | 4   | Female | 15.78 | Healthy     | Yes      | Yes                | 99,468         | 32,172,764         | 3,851,086 |
| SM18   | Matses     | 36  | Female | 26.44 | Overweight  | Yes      | Yes                | 103,438        | 31,120,212         | 3,476,246 |
| SM20   | Matses     | 20  | Female | 21.27 | Healthy     | Yes      | Yes                | 95,462         | 29,059,286         | 3,486,160 |
| SM23   | Matses     | 7   | Male   | 15.66 | Healthy     | Yes      | Yes                | 99,439         | 29,246,497         | 3,356,893 |
| SM24   | Matses     | 2   | Male   | 17.85 | Healthy     | Yes      | Yes                | 99,989         | 32,150,556         | 3,362,732 |
| SM25   | Matses     | 2   | Female | NA    | NA          | Yes      | Yes                | 282,526        | 30,670,037         | 2,781,980 |
| SM28   | Matses     | 52  | Female | 19.47 | Healthy     | Yes      | Yes                | 93,951         | 26,916,930         | 2,296,893 |
| SM29   | Matses     | 50  | Female | 17.9  | Underweight | Yes      | Yes                | 105,303        | 29,679,776         | 2,503,068 |
| SM30   | Matses     | 4   | Male   | 18.26 | Healthy     | Yes      | Yes                | 90,000         | 27,403,057         | 2,492,589 |

**Supplementary Table 3 (cont.) Participant metadata.**

| Sample      | Population    | Age | Sex    | BMI   | BMI Class  | 16S rRNA | Shotgun Metagenome | Read Depth 16S | Read Depth Shotgun |           |
|-------------|---------------|-----|--------|-------|------------|----------|--------------------|----------------|--------------------|-----------|
|             |               |     |        |       |            |          |                    |                | Paired             | Single    |
| <b>SM31</b> | <b>Matses</b> | 30  | Male   | 22.6  | Healthy    | Yes      | Yes                | 111,057        | 29,763,287         | 2,808,360 |
| <b>SM32</b> | <b>Matses</b> | 21  | Female | 22.14 | Healthy    | Yes      | Yes                | 91,905         | 34,345,773         | 3,796,280 |
| <b>SM33</b> | <b>Matses</b> | 5   | Female | 16.45 | Healthy    | Yes      | Yes                | 93,080         | 28,011,827         | 3,085,715 |
| <b>SM34</b> | <b>Matses</b> | 4   | Male   | 15.62 | Healthy    | Yes      | Yes                | 111,553        | 26,523,695         | 2,805,036 |
| <b>SM37</b> | <b>Matses</b> | 12  | Male   | 19.84 | Healthy    | Yes      | Yes                | 109,898        | 26,897,725         | 3,208,320 |
| <b>SM39</b> | <b>Matses</b> | 40  | Female | 28.93 | Overweight | Yes      | Yes                | 52,181         | 33,171,349         | 3,592,545 |
| <b>SM40</b> | <b>Matses</b> | 18  | Female | 22.72 | Healthy    | Yes      | Yes                | 83,169         | 22,027,536         | 4,731,158 |
| <b>SM41</b> | <b>Matses</b> | 6   | Male   | NA    | NA         | Yes      | Yes                | 85,973         | 30,018,788         | 4,505,169 |
| <b>SM42</b> | <b>Matses</b> | 4   | Male   | 16.73 | Healthy    | Yes      | Yes                | 109,175        | 27,856,765         | 3,847,805 |
| <b>SM43</b> | <b>Matses</b> | 2   | Female | 15.15 | Healthy    | Yes      | Yes                | 85,863         | 29,093,620         | 7,985,469 |
| <b>SM44</b> | <b>Matses</b> | 4   | Male   | 19.83 | Healthy    | Yes      | Yes                | 107,827        | 29,109,143         | 7,918,170 |
| <b>NO01</b> | <b>Norman</b> | 23  | Male   | 21.69 | Healthy    | Yes      | Yes                | 219,925        | 20,625,472         | 1,981,126 |
| <b>NO02</b> | <b>Norman</b> | 37  | Female | 20.52 | Healthy    | Yes      | Yes                | 123,772        | 25,977,359         | 2,216,831 |
| <b>NO03</b> | <b>Norman</b> | 40  | Male   | 23.37 | Healthy    | Yes      | Yes                | 84,042         | 26,854,797         | 2,338,379 |
| <b>NO04</b> | <b>Norman</b> | 26  | Male   | 24.16 | Healthy    | Yes      | Yes                | 120,143        | 23,801,292         | 2,203,115 |
| <b>NO05</b> | <b>Norman</b> | 28  | Male   | 22.19 | Healthy    | Yes      | Yes                | 125,909        | 24,207,515         | 2,162,375 |
| <b>NO06</b> | <b>Norman</b> | 28  | Male   | 23.49 | Healthy    | Yes      | Yes                | 148,940        | 19,877,728         | 1,709,795 |
| <b>NO07</b> | <b>Norman</b> | 32  | Female | 21.92 | Healthy    | Yes      | No                 | 357,828        | NA                 |           |
| <b>NO08</b> | <b>Norman</b> | 32  | Female | 20.01 | Healthy    | Yes      | Yes                | 234,531        | 21,375,588         | 1,542,028 |
| <b>NO09</b> | <b>Norman</b> | 34  | Female | 23.77 | Healthy    | Yes      | Yes                | 137,595        | 18,797,354         | 1,438,450 |
| <b>NO10</b> | <b>Norman</b> | 41  | Male   | 26.58 | Overweight | Yes      | Yes                | 171,714        | 23,486,818         | 1,605,024 |
| <b>NO11</b> | <b>Norman</b> | 26  | Male   | 23.93 | Healthy    | Yes      | Yes                | 163,147        | 25,017,951         | 1,757,924 |
| <b>NO12</b> | <b>Norman</b> | 27  | Female | 28.62 | Overweight | Yes      | Yes                | 139,647        | 24,281,027         | 1,701,998 |
| <b>NO13</b> | <b>Norman</b> | 35  | Male   | 20.34 | Healthy    | Yes      | Yes                | 73,907         | 22,261,146         | 1,590,912 |

**Supplementary Table 3 (cont.) Participant metadata.**

| Sample      | Population    | Age | Sex    | BMI   | BMI Class  | 16S rRNA | Shotgun Metagenome | Read Depth 16S | Read Depth Shotgun |           |
|-------------|---------------|-----|--------|-------|------------|----------|--------------------|----------------|--------------------|-----------|
|             |               |     |        |       |            |          |                    |                | Paired             | Single    |
| <b>NO14</b> | <b>Norman</b> | 10  | Female | 14.97 | Healthy    | Yes      | Yes                | 201,279        | 23,161,751         | 1,800,520 |
| <b>NO15</b> | <b>Norman</b> | 50  | Female | 25.92 | Overweight | Yes      | Yes                | 137,201        | 20,524,182         | 1,801,257 |
| <b>NO16</b> | <b>Norman</b> | 47  | Male   | 30.86 | Obese      | Yes      | Yes                | 207,056        | 28,327,953         | 2,251,370 |
| <b>NO17</b> | <b>Norman</b> | 10  | Male   | 21.53 | Overweight | Yes      | Yes                | 152,005        | 21,377,881         | 1,692,516 |
| <b>NO18</b> | <b>Norman</b> | 7   | Male   | 17.31 | Healthy    | Yes      | Yes                | 133,136        | 24,510,902         | 1,920,710 |
| <b>NO19</b> | <b>Norman</b> | 32  | Female | 19.30 | Healthy    | Yes      | Yes                | 169,580        | 23,047,857         | 1,888,095 |
| <b>NO20</b> | <b>Norman</b> | 26  | Male   | 27.86 | Overweight | Yes      | Yes                | 144,511        | 22,716,185         | 1,786,034 |
| <b>NO21</b> | <b>Norman</b> | 23  | Male   | 24.78 | Healthy    | Yes      | Yes                | 136,702        | 22,567,813         | 1,840,925 |
| <b>NO22</b> | <b>Norman</b> | 26  | Male   | 30.22 | Obese      | Yes      | Yes                | 133,508        | 24,490,144         | 1,997,954 |
| <b>NO23</b> | <b>Norman</b> | 26  | Female | 26.53 | Overweight | Yes      | Yes                | 157,919        | 26,588,425         | 2,307,414 |

**Supplementary Table 4. Summary of phyla with significantly different relative abundances (Kruskal-Wallis, FDR-adjusted  $P < 0.05$ ) among the three study populations.**

| Phylum         | p-value | FDR adjusted p-value | Median frequency (%) within populations |        |          |
|----------------|---------|----------------------|-----------------------------------------|--------|----------|
|                |         |                      | Norman                                  | Matses | Tunapuco |
| Euryarchaeota  | 0.0003  | 0.0006               | 0.0                                     | 0.3    | 0.1      |
| Actinobacteria | 0       | 0                    | 5.7                                     | 0.3    | 0.5      |
| Bacteroidetes  | 0       | 0                    | 2.6                                     | 8.3    | 47.2     |
| Cyanobacteria  | 0       | 0                    | 0.0                                     | 0.9    | 0.1      |
| Firmicutes     | 0       | 0                    | 81.5                                    | 68.0   | 32.3     |
| Proteobacteria | 0       | 0                    | 0.2                                     | 3.2    | 2.2      |
| Spirochaetes   | 0       | 0                    | 0.0                                     | 5.8    | 2.8      |
| Tenericutes    | 0       | 0                    | 0.0                                     | 3.0    | 0.2      |

**Supplementary Table 5. Summary of genera with significantly different relative abundances (Kruskal-Wallis, FDR-adjusted  $P < 0.05$ ) among the three study populations.**

| Taxonomy       |                                         | P-value | FDR adjusted P-value | Median frequency (%) within populations |        |          |
|----------------|-----------------------------------------|---------|----------------------|-----------------------------------------|--------|----------|
| Phylum         | Genus                                   |         |                      | Norman                                  | Matses | Tunapuco |
| Euryarchaeota  | <i>Methanobrevibacter</i>               | 0.0001  | 0.0005               | 0.0                                     | 0.3    | 0.0      |
| Actinobacteria | <i>Bifidobacterium</i>                  | 0       | 0                    | 3.7                                     | 0.0    | 0.0      |
| Actinobacteria | Unknown Coriobacteriaceae               | 0.0011  | 0.0034               | 0.0                                     | 0.2    | 0.2      |
| Actinobacteria | <i>Collinsella</i>                      | 0.0008  | 0.0026               | 0.2                                     | 0.0    | 0.1      |
| Bacteroidetes  | Unknown Bacteroidales                   | 0       | 0                    | 0.0                                     | 0.2    | 0.4      |
| Bacteroidetes  | Unknown Paraprevotellaceae              | 0       | 0                    | 0.0                                     | 0.1    | 0.0      |
| Bacteroidetes  | <i>Prevotella*</i> (Paraprevotellaceae) | 0       | 0                    | 0.0                                     | 0.1    | 0.3      |
| Bacteroidetes  | <i>Bacteroides</i>                      | 0       | 0                    | 1.4                                     | 0.1    | 0.0      |
| Bacteroidetes  | <i>Prevotella</i>                       | 0       | 0                    | 0.0                                     | 5.5    | 32.7     |
| Bacteroidetes  | Unknown Bacteroidales                   | 0       | 0                    | 0.0                                     | 0.5    | 1.2      |
| Cyanobacteria  | Unknown YS2                             | 0       | 0                    | 0.0                                     | 0.9    | 0.1      |
| Firmicutes     | Unknown Clostridiales                   | 0       | 0                    | 1.3                                     | 7.8    | 2.2      |
| Firmicutes     | Unknown Mogibacteriaceae                | 0.0003  | 0.001                | 0.0                                     | 0.1    | 0.0      |
| Firmicutes     | Unknown Christensenellaceae             | 0       | 0.0002               | 0.1                                     | 0.6    | 0.2      |
| Firmicutes     | <i>Clostridium</i>                      | 0       | 0                    | 0.1                                     | 1.2    | 0.3      |
| Firmicutes     | Unknown Lachnospiraceae                 | 0.0007  | 0.0023               | 7.3                                     | 4.1    | 2.1      |
| Firmicutes     | <i>Ruminococcus*</i> (Lachnospiraceae)  | 0       | 0.0001               | 1.3                                     | 0.4    | 0.2      |
| Firmicutes     | <i>Blautia</i>                          | 0.0019  | 0.0055               | 3.9                                     | 0.9    | 0.9      |
| Firmicutes     | <i>Coprococcus</i>                      | 0.0154  | 0.037                | 0.8                                     | 0.7    | 0.4      |
| Firmicutes     | <i>Dorea</i>                            | 0       | 0                    | 0.9                                     | 0.1    | 0.1      |
| Firmicutes     | <i>Lachnospira</i>                      | 0       | 0                    | 0.0                                     | 0.9    | 0.1      |
| Firmicutes     | <i>Ruminococcus</i>                     | 0.0052  | 0.0138               | 7.4                                     | 2.0    | 1.4      |
| Firmicutes     | <i>Dialister</i>                        | 0.0002  | 0.0009               | 0.0                                     | 0.5    | 1.1      |
| Firmicutes     | <i>Megasphaera</i>                      | 0       | 0                    | 0.0                                     | 0.0    | 0.1      |
| Firmicutes     | Unknown Erysipelotrichaceae             | 0       | 0                    | 0.3                                     | 0.2    | 0.0      |
| Firmicutes     | <i>Eubacterium</i>                      | 0       | 0                    | 0.0                                     | 0.8    | 0.1      |
| Firmicutes     | <i>Bulleidia</i>                        | 0       | 0                    | 0.0                                     | 0.2    | 0.0      |
| Firmicutes     | <i>Catenibacterium</i>                  | 0       | 0                    | 0.0                                     | 2.3    | 0.9      |
| Firmicutes     | Unknown Erysipelotrichaceae (P75.A5)    | 0       | 0                    | 0.0                                     | 0.2    | 0.0      |
| Proteobacteria | <i>Succinivibrio</i>                    | 0       | 0                    | 0.0                                     | 0.8    | 0.8      |
| Proteobacteria | Unknown Enterobacteriaceae              | 0.0006  | 0.0021               | 0.0                                     | 0.4    | 0.1      |
| Spirochaetes   | <i>Treponema</i>                        | 0       | 0                    | 0.0                                     | 5.8    | 2.8      |
| Tenericutes    | Unknown Mollicutes                      | 0       | 0                    | 0.0                                     | 2.5    | 0.2      |



**Supplementary Table 6. Accuracy of supervised classification at different phylogenetic levels expressed as percentages.**

| Taxonomic Level | Norman | Matses | Tunapuco |
|-----------------|--------|--------|----------|
| Phylum (L2)     | 100    | 73     | 91       |
| Class (L3)      | 100    | 87     | 94       |
| Order (L4)      | 100    | 87     | 94       |
| Family (L5)     | 100    | 91     | 97       |
| Genus (L6)      | 100    | 91     | 100      |
| OTU (L7)        | 100    | 100    | 100      |

**Supplementary Table 7. Confusion Matrix displaying accuracy of supervised classification based on KEGG Orthology (KO).**

|        |          | Predicted |        |          | Classification accuracy (%) |
|--------|----------|-----------|--------|----------|-----------------------------|
|        |          | Norman    | Matses | Tunapuco |                             |
| Actual | Norman   | 23        | 0      | 0        | 100                         |
|        | Matses   | 0         | 24     | 0        | 100                         |
|        | Tunapuco | 0         | 1      | 11       | 92                          |

**Supplementary Table 8. Summary of KEGG Orthology (KO) ids with significantly different relative abundances (Kruskal-Wallis, FDR-adjusted  $P < 0.05$ ) among the three study populations.**

| KEGG ORTHOLOGY | $P$  | FDR-corrected $P$ | Norman  | Matses | Tunapuco | Function                                                                                                |
|----------------|------|-------------------|---------|--------|----------|---------------------------------------------------------------------------------------------------------|
| K00265         | 0.00 | 0.00              | 151.00  | 200.00 | 264.50   | Metabolism; Amino Acid Metabolism; Alanine, aspartate and glutamate metabolism; K00265                  |
| K00266         | 0.00 | 0.00              | 195.00  | 273.00 | 314.50   | Metabolism; Amino Acid Metabolism; Alanine, aspartate and glutamate metabolism; K00266                  |
| K00527         | 0.00 | 0.00              | 189.00  | 267.00 | 289.00   | Metabolism; Nucleotide Metabolism; Purine/Pyrimidine metabolism; K00527                                 |
| K00540         | 0.00 | 0.02              | 566.00  | 608.00 | 671.50   | Unclassified; Metabolism; Others; K00540                                                                |
| K00548         | 0.00 | 0.01              | 187.00  | 172.50 | 225.50   | Metabolism; Amino Acid Metabolism; Cysteine and methionine metabolism; K00548                           |
| K00558         | 0.00 | 0.01              | 266.00  | 370.50 | 290.50   | Metabolism; Amino Acid Metabolism; Cysteine and methionine metabolism; K00558                           |
| K00599         | 0.00 | 0.00              | 649.00  | 687.50 | 541.50   | Metabolism; Amino Acid Metabolism; Histidine/Tyrosine metabolism; K00599                                |
| K00615         | 0.00 | 0.01              | 220.00  | 284.50 | 246.50   | Metabolism; Carbohydrate Metabolism; Pentose phosphate pathway; K00615                                  |
| K00688         | 0.00 | 0.00              | 222.00  | 265.00 | 296.50   | Metabolism; Carbohydrate Metabolism; Starch and sucrose metabolism; K00688                              |
| K00700         | 0.00 | 0.00              | 179.00  | 182.50 | 212.00   | Metabolism; Carbohydrate Metabolism; Starch and sucrose metabolism; K00700                              |
| K00705         | 0.00 | 0.00              | 162.00  | 221.00 | 299.50   | Metabolism; Carbohydrate Metabolism; Starch and sucrose metabolism; K00705                              |
| K00754         | 0.00 | 0.00              | 560.00  | 455.00 | 498.00   | Metabolism; Carbohydrate Metabolism; Fructose and mannose metabolism; K00754                            |
| K00764         | 0.00 | 0.00              | 161.00  | 193.50 | 215.00   | Metabolism; Amino Acid Metabolism; Alanine, aspartate and glutamate metabolism; K00764                  |
| K00936         | 0.00 | 0.00              | 1214.00 | 807.50 | 748.50   | Unclassified; Metabolism; Others; K00936                                                                |
| K00951         | 0.00 | 0.00              | 171.00  | 204.50 | 263.50   | Metabolism; Nucleotide Metabolism; Purine metabolism; K00951                                            |
| K01006         | 0.00 | 0.00              | 129.00  | 200.50 | 173.50   | Metabolism; Carbohydrate Metabolism; Pyruvate metabolism; K01006                                        |
| K01043         | 0.00 | 0.00              | 84.00   | 121.00 | 213.50   | Unclassified; Metabolism; Others; K01043                                                                |
| K01153         | 0.00 | 0.00              | 237.00  | 402.50 | 455.50   | Unclassified; Genetic Information Processing; Restriction enzyme; K01153                                |
| K01154         | 0.00 | 0.00              | 147.00  | 213.50 | 240.00   | Unclassified; Genetic Information Processing; Restriction enzyme; K01154                                |
| K01176         | 0.00 | 0.00              | 83.00   | 125.50 | 214.50   | Metabolism; Carbohydrate Metabolism; Starch and sucrose metabolism; K01176                              |
| K01187         | 0.00 | 0.00              | 240.00  | 239.00 | 323.50   | Metabolism; Carbohydrate Metabolism; Starch and sucrose metabolism; K01187                              |
| K01190         | 0.00 | 0.01              | 552.00  | 437.50 | 575.00   | Metabolism; Glycan Biosynthesis and Metabolism; Other glycan degradation; K01190                        |
| K01338         | 0.00 | 0.00              | 162.00  | 194.50 | 237.50   | Metabolism; Enzyme Families; Peptidases; K01338                                                         |
| K01362         | 0.01 | 0.03              | 261.00  | 222.00 | 227.00   | Unclassified; Metabolism; Amino acid metabolism; K01362                                                 |
| K01417         | 0.00 | 0.00              | 207.00  | 258.50 | 272.50   | Unclassified; Metabolism; Others; K01417                                                                |
| K01447         | 0.01 | 0.03              | 202.00  | 170.50 | 132.50   | Unclassified; Cellular Processes and Signaling; Membrane and intracellular structural molecules; K01447 |
| K01534         | 0.00 | 0.00              | 172.00  | 239.50 | 198.50   | Unclassified; Metabolism; Energy metabolism; K01534                                                     |
| K01537         | 0.00 | 0.00              | 291.00  | 296.50 | 373.00   | Unclassified; Metabolism; Others; K01537                                                                |
| K01552         | 0.00 | 0.00              | 248.00  | 326.50 | 319.00   | Unclassified; Metabolism; Energy metabolism; K01552                                                     |
| K01662         | 0.00 | 0.00              | 138.00  | 180.00 | 237.50   | Metabolism; Metabolism of Terpenoids and Polyketides; Terpenoid backbone biosynthesis; K01662           |
| K01681         | 0.00 | 0.00              | 124.00  | 184.00 | 209.50   | Metabolism; Carbohydrate Metabolism; Citrate cycle (TCA cycle); K01681                                  |

| <b>Supplementary Table 8 (cont.) Summary of KEGG Orthology</b> |          |                        |               |               |                 |                                                                                                  |
|----------------------------------------------------------------|----------|------------------------|---------------|---------------|-----------------|--------------------------------------------------------------------------------------------------|
| <b>KEGG ORTHOLOGY</b>                                          | <b>P</b> | <b>FDR-corrected P</b> | <b>Norman</b> | <b>Matses</b> | <b>Tunapuco</b> | <b>Function</b>                                                                                  |
| K01710                                                         | 0.00     | 0.00                   | 137.00        | 187.00        | 211.50          | Metabolism; Metabolism of Terpenoids and Polyketides; Polyketide sugar unit biosynthesis; K01710 |
| K01740                                                         | 0.00     | 0.00                   | 187.00        | 237.00        | 230.00          | Metabolism; Amino Acid Metabolism; Cysteine and methionine metabolism; K01740                    |
| K01784                                                         | 0.00     | 0.00                   | 185.00        | 255.00        | 252.50          | Metabolism; Carbohydrate Metabolism; Amino sugar and nucleotide sugar metabolism; K01784         |
| K01834                                                         | 0.00     | 0.00                   | 245.00        | 301.00        | 318.00          | Metabolism; Carbohydrate Metabolism; Glycolysis / Gluconeogenesis; K01834                        |
| K01840                                                         | 0.00     | 0.00                   | 143.00        | 208.50        | 214.50          | Metabolism; Carbohydrate Metabolism; Fructose and mannose metabolism; K01840                     |
| K01869                                                         | 0.00     | 0.00                   | 143.00        | 212.50        | 239.50          | Metabolism; Amino Acid Metabolism; Valine, leucine and isoleucine biosynthesis; K01869           |
| K01870                                                         | 0.00     | 0.00                   | 171.00        | 221.50        | 262.50          | Metabolism; Amino Acid Metabolism; Valine, leucine and isoleucine biosynthesis; K01870           |
| K01872                                                         | 0.00     | 0.00                   | 142.00        | 187.50        | 227.00          | Genetic Information Processing; Translation; Aminoacyl-tRNA biosynthesis; K01872                 |
| K01873                                                         | 0.00     | 0.00                   | 156.00        | 217.50        | 217.00          | Metabolism; Amino Acid Metabolism; Valine, leucine and isoleucine biosynthesis; K01873           |
| K01874                                                         | 0.00     | 0.00                   | 134.00        | 174.50        | 210.00          | Metabolism; Amino Acid Metabolism; Amino acid related enzymes; K01874                            |
| K01876                                                         | 0.00     | 0.00                   | 135.00        | 215.50        | 201.00          | Genetic Information Processing; Translation; Aminoacyl-tRNA biosynthesis; K01876                 |
| K01887                                                         | 0.00     | 0.00                   | 114.00        | 161.50        | 205.50          | Genetic Information Processing; Translation; Aminoacyl-tRNA biosynthesis; K01887                 |
| K01890                                                         | 0.00     | 0.00                   | 127.00        | 156.50        | 210.00          | Genetic Information Processing; Translation; Aminoacyl-tRNA biosynthesis; K01890                 |
| K01897                                                         | 0.00     | 0.00                   | 107.00        | 151.00        | 242.00          | Metabolism; Lipid Metabolism; Fatty acid metabolism; K01897                                      |
| K01915                                                         | 0.00     | 0.00                   | 230.00        | 291.00        | 324.00          | Metabolism; Amino Acid Metabolism; Alanine, aspartate and glutamate metabolism; K01915           |
| K01952                                                         | 0.00     | 0.00                   | 168.00        | 222.50        | 292.50          | Metabolism; Nucleotide Metabolism; Purine metabolism; K01952                                     |
| K01955                                                         | 0.00     | 0.00                   | 236.00        | 313.00        | 400.50          | Metabolism; Nucleotide Metabolism; Pyrimidine metabolism; K01955                                 |
| K02004                                                         | 0.00     | 0.00                   | 843.00        | 610.00        | 651.50          | Environmental Information Processing; Membrane Transport; Transporters; K02004                   |
| K02014                                                         | 0.01     | 0.02                   | 686.00        | 453.00        | 817.50          | Unclassified; Cellular Processes and Signaling; Pores ion channels; K02014                       |
| K02025                                                         | 0.00     | 0.00                   | 349.00        | 324.50        | 202.50          | Environmental Information Processing; Membrane Transport; Transporters; K02025                   |
| K02026                                                         | 0.00     | 0.00                   | 314.00        | 280.50        | 188.50          | Environmental Information Processing; Membrane Transport; Transporters; K02026                   |
| K02027                                                         | 0.00     | 0.00                   | 212.00        | 126.00        | 122.00          | Environmental Information Processing; Membrane Transport; Transporters; K02027                   |
| K02030                                                         | 0.00     | 0.00                   | 263.00        | 304.50        | 221.00          | Environmental Information Processing; Membrane Transport; Transporters; K02030                   |
| K02335                                                         | 0.00     | 0.00                   | 134.00        | 168.00        | 257.00          | Metabolism; Nucleotide Metabolism; Purine/Pyrimidine metabolism; K02335                          |
| K02337                                                         | 0.00     | 0.00                   | 172.00        | 250.00        | 310.00          | Metabolism; Nucleotide Metabolism; Purine/Pyrimidine metabolism; K02337                          |
| K02355                                                         | 0.00     | 0.00                   | 324.00        | 402.50        | 458.50          | Genetic Information Processing; Translation; Translation factors; K02355                         |
| K02469                                                         | 0.00     | 0.00                   | 247.00        | 319.50        | 351.50          | Genetic Information Processing; Replication and Repair; DNA replication proteins; K02469         |
| K02470                                                         | 0.00     | 0.00                   | 220.00        | 297.50        | 281.50          | Genetic Information Processing; Replication and Repair; DNA replication proteins; K02470         |
| K02483                                                         | 0.00     | 0.00                   | 266.00        | 202.00        | 119.00          | Environmental Information Processing; Signal Transduction; Two-component system; K02483          |
| K02519                                                         | 0.00     | 0.00                   | 125.00        | 181.50        | 249.50          | Genetic Information Processing; Translation; Translation factors; K02519                         |
| K03043                                                         | 0.00     | 0.00                   | 200.00        | 289.00        | 362.50          | Metabolism; Nucleotide Metabolism; Purine/Pyrimidine metabolism; K03043                          |
| K03046                                                         | 0.00     | 0.00                   | 194.00        | 310.00        | 352.00          | Metabolism; Nucleotide Metabolism; Purine/Pyrimidine metabolism; K03046                          |

**Supplementary Table 8 (cont.) Summary of KEGG Orthology**

| KEGG ORTHOLOGY | <i>P</i> | FDR-corrected <i>P</i> | Norman  | Matses  | Tunapuco | Function                                                                                                   |
|----------------|----------|------------------------|---------|---------|----------|------------------------------------------------------------------------------------------------------------|
| K03070         | 0.00     | 0.00                   | 166.00  | 246.00  | 256.00   | Genetic Information Processing; Folding, Sorting and Degradation; Protein export; K03070                   |
| K03088         | 0.00     | 0.00                   | 551.00  | 351.00  | 272.50   | Genetic Information Processing; Transcription; Transcription machinery; K03088                             |
| K03091         | 0.00     | 0.01                   | 249.00  | 237.50  | 131.00   | Genetic Information Processing; Transcription; Transcription machinery; K03091                             |
| K03168         | 0.00     | 0.00                   | 130.00  | 184.00  | 218.00   | Genetic Information Processing; Replication and Repair; DNA replication proteins; K03168                   |
| K03169         | 0.00     | 0.00                   | 319.00  | 288.50  | 197.50   | Genetic Information Processing; Replication and Repair; DNA replication proteins; K03169                   |
| K03205         | 0.00     | 0.00                   | 543.00  | 347.50  | 157.00   | Environmental Information Processing; Membrane Transport; Bacterial secretion system; K03205               |
| K03296         | 0.00     | 0.00                   | 309.00  | 192.00  | 280.50   | Unclassified; Cellular Processes and Signaling; Other ion-coupled transporters; K03296                     |
| K03315         | 0.00     | 0.00                   | 136.00  | 153.00  | 214.00   | Metabolism; Energy Metabolism; Methane metabolism; K03315                                                  |
| K03423         | 0.00     | 0.01                   | 167.00  | 204.00  | 213.00   | Unclassified; Metabolism; Others; K03423                                                                   |
| K03427         | 0.00     | 0.00                   | 229.00  | 403.00  | 373.50   | Unclassified; Genetic Information Processing; Restriction enzyme; K03427                                   |
| K03495         | 0.00     | 0.00                   | 128.00  | 198.50  | 201.50   | Genetic Information Processing; Replication and Repair; Chromosome; K03495                                 |
| K03496         | 0.00     | 0.01                   | 281.00  | 297.00  | 238.50   | Cellular Processes; Cell Motility; Cytoskeleton proteins; K03496                                           |
| K03497         | 0.00     | 0.00                   | 327.00  | 291.50  | 222.00   | Genetic Information Processing; Transcription; Transcription factors; K03497                               |
| K03555         | 0.00     | 0.00                   | 153.00  | 196.50  | 263.00   | Genetic Information Processing; Replication and Repair; DNA repair and recombination proteins; K03555      |
| K03654         | 0.00     | 0.00                   | 132.00  | 165.50  | 280.50   | Genetic Information Processing; Replication and Repair; DNA repair and recombination proteins; K03654      |
| K03655         | 0.00     | 0.00                   | 267.00  | 446.50  | 542.50   | Genetic Information Processing; Replication and Repair; DNA repair and recombination proteins; K03655      |
| K03695         | 0.00     | 0.00                   | 138.00  | 188.00  | 212.50   | Genetic Information Processing; Folding, Sorting and Degradation; Chaperones and folding catalysts; K03695 |
| K03701         | 0.00     | 0.00                   | 222.00  | 385.50  | 471.00   | Genetic Information Processing; Replication and Repair; DNA repair and recombination proteins; K03701      |
| K03702         | 0.00     | 0.00                   | 123.00  | 216.00  | 214.00   | Genetic Information Processing; Replication and Repair; DNA repair and recombination proteins; K03702      |
| K03723         | 0.00     | 0.00                   | 154.00  | 198.50  | 273.00   | Genetic Information Processing; Replication and Repair; DNA repair and recombination proteins; K03723      |
| K03737         | 0.00     | 0.00                   | 181.00  | 224.50  | 308.00   | Metabolism; Energy Metabolism; Carbon fixation pathways in prokaryotes; K03737                             |
| K04043         | 0.00     | 0.00                   | 141.00  | 225.00  | 217.50   | Genetic Information Processing; Folding, Sorting and Degradation; RNA degradation; K04043                  |
| K04759         | 0.00     | 0.01                   | 253.00  | 318.50  | 331.00   | Unclassified; Cellular Processes and Signaling; Other transporters; K04759                                 |
| K05349         | 0.00     | 0.00                   | 278.00  | 256.00  | 407.00   | Metabolism; Carbohydrate Metabolism; Starch and sucrose metabolism; K05349                                 |
| K05366         | 0.00     | 0.00                   | 130.00  | 180.00  | 249.00   | Metabolism; Glycan Biosynthesis and Metabolism; Glycosyltransferases; K05366                               |
| K06147         | 0.01     | 0.02                   | 1034.00 | 1073.00 | 858.00   | Environmental Information Processing; Membrane Transport; Transporters; K06147                             |
| K06148         | 0.00     | 0.01                   | 244.00  | 333.50  | 227.50   | Environmental Information Processing; Membrane Transport; ABC transporters; K06148                         |
| K06180         | 0.00     | 0.00                   | 158.00  | 199.00  | 208.50   | Genetic Information Processing; Translation; Ribosome Biogenesis; K06180                                   |
| K06400         | 0.00     | 0.00                   | 649.00  | 465.00  | 286.50   | Unclassified; Cellular Processes and Signaling; Sporulation; K06400                                        |
| K06919         | 0.00     | 0.00                   | 295.00  | 172.00  | 108.50   | Unclassified; Genetic Information Processing; Replication, recombination and repair proteins; K06919       |
| K06921         | 0.00     | 0.00                   | 79.00   | 180.50  | 203.00   | Unclassified; Poorly Characterized; General function prediction only; K06921                               |
| K06950         | 0.00     | 0.00                   | 169.00  | 210.00  | 213.00   | Unclassified; Poorly Characterized; General function prediction only; K06950                               |

**Supplementary Table 8 (cont.) Summary of KEGG Orthology**

| <b>KEGG ORTHOLOGY</b> | <b><i>P</i></b> | <b>FDR-corrected <i>P</i></b> | <b>Norman</b> | <b>Matses</b> | <b>Tunapuco</b> | <b>Function</b>                                                                                      |
|-----------------------|-----------------|-------------------------------|---------------|---------------|-----------------|------------------------------------------------------------------------------------------------------|
| K07030                | 0.00            | 0.00                          | 220.00        | 170.50        | 148.50          | Unclassified; Poorly Characterized; General function prediction only; K07030                         |
| K07114                | 0.01            | 0.03                          | 459.00        | 277.00        | 465.00          | Unclassified; Poorly Characterized; General function prediction only; K07114                         |
| K07133                | 0.00            | 0.00                          | 297.00        | 924.50        | 1293.50         | Unclassified; Poorly Characterized; General function prediction only; K07133                         |
| K07137                | 0.00            | 0.00                          | 155.00        | 206.00        | 174.50          | Unclassified; Poorly Characterized; General function prediction only; K07137                         |
| K07319                | 0.00            | 0.00                          | 119.00        | 191.50        | 225.50          | Unclassified; Genetic Information Processing; Replication, recombination and repair proteins; K07319 |
| K07495                | 0.00            | 0.00                          | 24.00         | 104.50        | 305.50          | Unclassified; Genetic Information Processing; Replication, recombination and repair proteins; K07495 |
| K07497                | 0.00            | 0.01                          | 243.00        | 338.00        | 375.50          | Unclassified; Genetic Information Processing; Replication, recombination and repair proteins; K07497 |
| K07636                | 0.00            | 0.00                          | 237.00        | 165.00        | 171.50          | Metabolism; Enzyme Families; Protein kinases; K07636                                                 |
| K07658                | 0.00            | 0.00                          | 237.00        | 161.00        | 119.00          | Environmental Information Processing; Signal Transduction; Two-component system; K07658              |
| K07720                | 0.00            | 0.00                          | 358.00        | 202.00        | 213.00          | Environmental Information Processing; Signal Transduction; Two-component system; K07720              |
| K08303                | 0.00            | 0.00                          | 171.00        | 207.50        | 249.00          | Metabolism; Enzyme Families; Peptidases; K08303                                                      |
| K09686                | 0.00            | 0.00                          | 221.00        | 157.50        | 141.00          | Environmental Information Processing; Membrane Transport; ABC transporters; K09686                   |
| K09687                | 0.00            | 0.00                          | 296.00        | 210.50        | 147.50          | Environmental Information Processing; Membrane Transport; ABC transporters; K09687                   |
| K09691                | 0.01            | 0.02                          | 373.00        | 293.50        | 241.00          | Environmental Information Processing; Membrane Transport; ABC transporters; K09691                   |
| K09810                | 0.00            | 0.00                          | 575.00        | 512.50        | 384.50          | Environmental Information Processing; Membrane Transport; Transporters; K09810                       |
| K12373                | 0.00            | 0.00                          | 236.00        | 117.00        | 217.00          | Metabolism; Carbohydrate Metabolism; Amino sugar and nucleotide sugar metabolism; K12373             |

**Supplementary Table 9. Summary of Enzyme Commission (EC) codes with significantly different relative abundances (Kruskal-Wallis, FDR-adjusted  $P < 0.05$ ) among the three study populations (see attached Excel sheet).**

| EC code   | P    | FDR-corrected P | Norman  | Matses  | Tunapuco | Function                                          |
|-----------|------|-----------------|---------|---------|----------|---------------------------------------------------|
| 1.1.1.205 | 0.00 | 0.00            | 119.50  | 157.25  | 185.25   | IMP Dehydrogenase                                 |
| 1.1.1.22  | 0.00 | 0.00            | 92.50   | 140.50  | 127.50   | UDP-glucose dehydrogenase                         |
| 1.1.1.274 | 0.00 | 0.00            | 32.50   | 73.75   | 30.00    | didehydrogluconate reductase                      |
| 1.1.1.40  | 0.00 | 0.00            | 20.50   | 32.50   | 59.75    | Malate dehydrogenase                              |
| 1.17.7.1  | 0.00 | 0.00            | 87.50   | 125.25  | 142.00   | diphosphate synthase                              |
| 1.3.99.1  | 0.00 | 0.00            | 164.50  | 230.50  | 270.25   | Succinate dehydrogenase                           |
| 1.4.1.14  | 0.00 | 0.00            | 335.50  | 482.25  | 595.25   | Glutamate synthase                                |
| 1.8.1.8   | 0.00 | 0.00            | 25.00   | 33.75   | 71.00    | Protein disulfide reductase                       |
| 2.1.1.14  | 0.00 | 0.00            | 58.00   | 112.75  | 91.25    | Homocysteine methylase                            |
| 2.1.1.31  | 0.00 | 0.00            | 75.00   | 114.75  | 102.25   |                                                   |
| 2.1.1.72  | 0.00 | 0.00            | 496.50  | 838.00  | 757.00   | DNA methyltransferase                             |
| 2.1.2.1   | 0.00 | 0.00            | 88.50   | 143.50  | 145.00   | Glycine hydroxymethyltransferase                  |
| 2.1.2.3   | 0.00 | 0.00            | 99.50   | 144.75  | 162.50   |                                                   |
| 2.2.1.7   | 0.00 | 0.00            | 134.00  | 188.00  | 245.50   | Xylulose-5-phosphate synthase                     |
| 2.4.1.11  | 0.00 | 0.00            | 16.50   | 29.25   | 62.50    | Glycogen synthase                                 |
| 2.4.1.182 | 0.00 | 0.00            | 20.50   | 28.50   | 64.00    | Lipid-A-disaccharide syntahse                     |
| 2.4.1.25  | 0.00 | 0.00            | 164.00  | 219.75  | 301.50   | 4-alpha-gluconotransferase                        |
| 2.4.2.7   | 0.00 | 0.00            | 54.50   | 89.00   | 69.00    | Adenine phosphoribosyltransferase                 |
| 2.5.1.17  | 0.00 | 0.00            | 58.00   | 25.00   | 25.00    | Cob(Dy)rinic acid a,c-diamide adenosyltransferase |
| 2.5.1.75  | 0.00 | 0.00            | 69.00   | 94.75   | 105.25   | tRNA dimethylallyltransferase                     |
| 2.6.1.1   | 0.00 | 0.00            | 106.00  | 144.75  | 197.25   | Aspartate transaminase                            |
| 2.7.1.45  | 0.00 | 0.00            | 82.00   | 129.75  | 112.00   | 2-keto-3-deoxygluconokinase                       |
| 2.7.1.48  | 0.00 | 0.00            | 108.00  | 154.00  | 182.25   | Uridine kinase                                    |
| 2.7.1.6   | 0.00 | 0.00            | 89.50   | 129.75  | 136.50   | Galactokinase                                     |
| 2.7.1.90  | 0.00 | 0.00            | 15.50   | 45.00   | 58.50    | Fructose-6-phosphate phosphotransferase           |
| 2.7.13.3  | 0.00 | 0.00            | 934.00  | 596.50  | 623.75   | Histidine kinase                                  |
| 2.7.6.2   | 0.00 | 0.00            | 51.50   | 31.75   | 30.50    | Thiamine diphosphokinase                          |
| 2.7.7.19  | 0.00 | 0.00            | 26.00   | 35.50   | 85.00    | Polynucleotide adenyllyltransferase               |
| 2.7.7.24  | 0.00 | 0.00            | 72.00   | 128.25  | 122.25   | Glucose-1-phosphate thymidyltransferase           |
| 2.7.7.6   | 0.00 | 0.00            | 540.00  | 790.75  | 930.25   | DNA -directed RNA polymerase                      |
| 2.7.7.8   | 0.00 | 0.00            | 129.50  | 182.00  | 198.75   | Polynucleotide phosphorylase                      |
| 2.7.9.2   | 0.00 | 0.00            | 32.50   | 62.50   | 117.00   | Phosphoenolpyruvate synthase                      |
| 3.1.21.3  | 0.00 | 0.00            | 380.00  | 671.75  | 721.75   | DNase Type I                                      |
| 3.1.21.4  | 0.00 | 0.00            | 74.50   | 114.75  | 147.50   | DNase Type II                                     |
| 3.1.21.5  | 0.00 | 0.00            | 32.00   | 67.75   | 76.50    | DNase Type III                                    |
| 3.1.3.48  | 0.00 | 0.00            | 175.00  | 122.00  | 111.00   | Phospho-tyrosine-phosphatase                      |
| 3.2.1.1   | 0.00 | 0.00            | 98.50   | 156.25  | 244.00   | Alpha-amylase                                     |
| 3.2.1.40  | 0.00 | 0.00            | 102.50  | 56.25   | 82.25    | Alpha-L-rhamnosidase                              |
| 3.2.1.52  | 0.00 | 0.00            | 288.50  | 159.25  | 242.50   | Hexosaminidase                                    |
| 3.4.11.4  | 0.00 | 0.00            | 61.00   | 80.75   | 117.25   | Aminoamidase                                      |
| 3.4.11.9  | 0.00 | 0.00            | 110.00  | 133.25  | 166.75   | Xaa-Pro aminopeptidase                            |
| 3.4.14.4  | 0.00 | 0.00            | 28.50   | 46.75   | 97.25    | Dipeptidyl-peptidase III                          |
| 3.4.21.53 | 0.00 | 0.00            | 162.50  | 195.75  | 253.00   | ATP-dependent serine proteinase                   |
| 3.4.22.40 | 0.00 | 0.00            | 41.00   | 67.75   | 139.50   | Aminoamidase C                                    |
| 3.5.1.53  | 0.00 | 0.00            | 28.50   | 41.50   | 59.75    | N-carbamoylputrescine amidase                     |
| 3.5.4.12  | 0.00 | 0.00            | 70.00   | 107.00  | 83.00    | dCMP deaminase                                    |
| 3.5.99.6  | 0.00 | 0.00            | 88.00   | 102.50  | 146.75   | Glucosamine-6-phosphate deaminase                 |
| 3.6.3.12  | 0.00 | 0.00            | 89.00   | 4.50    | 4.25     | Potassium-transporting ATPase                     |
| 3.6.3.2   | 0.00 | 0.00            | 28.50   | 142.00  | 22.75    | Magnesium-translocating ATPase                    |
| 3.6.4.12  | 0.00 | 0.00            | 1024.50 | 1324.25 | 1641.75  | DNA helicase                                      |
| 3.6.4.13  | 0.00 | 0.00            | 55.50   | 87.75   | 146.50   | RNA helicase                                      |
| 4.1.1.19  | 0.00 | 0.00            | 65.00   | 87.25   | 116.25   | Arginine decarboxylase                            |
| 4.1.1.49  | 0.00 | 0.00            | 75.00   | 102.25  | 122.75   | Phosphoenolpyruvate carboxykinase                 |
| 4.1.2.4   | 0.00 | 0.00            | 60.50   | 98.00   | 69.50    | Deoxyribose-phosphate aldolase                    |
| 4.1.3.6   | 0.00 | 0.00            | 25.50   | 83.50   | 68.00    | Citrate lyase                                     |
| 4.2.1.3   | 0.00 | 0.00            | 127.00  | 188.25  | 215.50   | Aconitate hydratase                               |
| 4.2.1.46  | 0.00 | 0.00            | 138.00  | 183.25  | 213.25   | dTDP-glucose dehydratase                          |
| 4.3.2.2   | 0.00 | 0.00            | 99.50   | 145.75  | 167.75   | Adenylosuccinate lyase                            |
| 4.4.1.16  | 0.00 | 0.00            | 81.00   | 114.00  | 124.75   | Selenocysteine lyase                              |

**Supplementary Table 9 (cont.) Summary of ECs**

| EC code  | P    | FDR-corrected P | Norman | Matses | Tunapuco | Function                                 |
|----------|------|-----------------|--------|--------|----------|------------------------------------------|
| 4.4.1.5  | 0.00 | 0.00            | 67.00  | 48.00  | 27.50    | Lactoylglutathione lyase                 |
| 4.99.1.3 | 0.00 | 0.00            | 72.50  | 48.25  | 35.25    | Cobaltochelataase                        |
| 5.1.3.14 | 0.00 | 0.00            | 75.00  | 121.75 | 98.50    | UDP-N-acetylglucosamine 2-epimerase      |
| 5.3.1.13 | 0.00 | 0.00            | 17.00  | 34.25  | 55.50    | Arabinose-5-phosphate isomerase          |
| 5.4.2.6  | 0.00 | 0.00            | 68.50  | 32.25  | 31.50    | Beta-phosphoglucomutase                  |
| 5.4.2.8  | 0.00 | 0.00            | 130.00 | 180.75 | 197.25   | Phosphomannomutase                       |
| 6.1.1.12 | 0.00 | 0.00            | 137.50 | 210.75 | 211.25   | Aspartate tRNA ligase                    |
| 6.1.1.16 | 0.00 | 0.00            | 102.50 | 161.25 | 158.50   | Cysteine tRNA ligase                     |
| 6.1.1.17 | 0.00 | 0.00            | 108.00 | 148.25 | 165.00   | Glutamate tRNA ligase                    |
| 6.1.1.19 | 0.00 | 0.00            | 109.50 | 161.00 | 199.00   | Arginine tRNA ligase                     |
| 6.1.1.20 | 0.00 | 0.00            | 215.00 | 275.50 | 354.50   | Phenylalanine tRNA ligase                |
| 6.1.1.22 | 0.00 | 0.00            | 84.50  | 129.25 | 126.50   | Asparagine tRNA ligase                   |
| 6.1.1.4  | 0.00 | 0.00            | 151.50 | 236.25 | 252.25   | Leucine tRNA ligase                      |
| 6.1.1.7  | 0.00 | 0.00            | 139.50 | 179.25 | 231.75   | Alanine tRNA ligase                      |
| 6.1.1.9  | 0.00 | 0.00            | 150.50 | 225.00 | 227.00   | Valine tRNA ligase                       |
| 6.2.1.1  | 0.00 | 0.00            | 42.00  | 73.75  | 117.00   | Acetate CoA ligase                       |
| 6.2.1.3  | 0.00 | 0.00            | 109.00 | 156.75 | 234.50   | Fatty acid CoA ligase                    |
| 6.3.2.9  | 0.00 | 0.00            | 86.00  | 103.25 | 129.00   | D-glutamate ligase                       |
| 6.3.4.2  | 0.00 | 0.00            | 109.50 | 164.50 | 181.00   | CTP synthase                             |
| 6.3.5.1  | 0.00 | 0.00            | 97.50  | 114.50 | 146.25   | NAD+ synthase                            |
| 6.3.5.10 | 0.00 | 0.00            | 63.50  | 42.25  | 37.50    | Adenosylcobyrinic acid synthase          |
| 6.3.5.3  | 0.00 | 0.00            | 167.50 | 223.00 | 294.25   | Phosphoribosylformylglycinamide synthase |
| 1.6.-.-  | 0.00 | 0.00            | 71.00  | 17.50  | 18.50    |                                          |
| 1.6.5.-  | 0.00 | 0.00            | 71.50  | 139.25 | 274.75   |                                          |
| 2.-.-.-  | 0.00 | 0.00            | 59.50  | 90.50  | 117.25   |                                          |
| 3.4.-.-  | 0.00 | 0.00            | 382.00 | 485.25 | 615.50   |                                          |
| 3.4.21.- | 0.00 | 0.00            | 77.00  | 112.75 | 214.75   |                                          |
| 3.4.24.- | 0.00 | 0.00            | 384.50 | 463.75 | 595.25   |                                          |
| 3.6.1.-  | 0.00 | 0.00            | 471.50 | 594.00 | 741.00   |                                          |
| 3.6.3.-  | 0.00 | 0.00            | 187.00 | 268.50 | 331.00   |                                          |
| 5.-.-.-  | 0.00 | 0.00            | 131.00 | 202.50 | 227.00   |                                          |
| 5.99.1.- | 0.00 | 0.00            | 71.50  | 157.50 | 235.50   |                                          |

**Supplementary Table 10. Prevalence of Spirochaetes in human gut microbiomes studied to date.** A minimum of 0.01% relative abundance was used to denote presence of the taxon.

| Population                                                                                             | Individuals positive for Spirochaetes (n) | Total individuals analyzed (n) | Max. observed frequency (%) | Mean frequency (%; mean $\pm$ s.d) |
|--------------------------------------------------------------------------------------------------------|-------------------------------------------|--------------------------------|-----------------------------|------------------------------------|
| Venezuela <sup>1</sup>                                                                                 | 28                                        | 88                             | 8.25                        | 0.47 $\pm$ 1.28                    |
| Malawi <sup>1</sup>                                                                                    | 21                                        | 59                             | 13.72                       | 0.78 $\pm$ 2.22                    |
| Tunapuco <sup>b</sup>                                                                                  | 29                                        | 31                             | 42.01                       | 7.17 $\pm$ 9.79                    |
| Hadza <sup>2</sup>                                                                                     | 27                                        | 27                             | 21.31                       | 2.85 $\pm$ 4.43                    |
| Matses <sup>b</sup>                                                                                    | 18                                        | 25                             | 60.78                       | 10.69 $\pm$ 15.38                  |
| USA (St. Louis, Philadelphia) <sup>1</sup>                                                             | 0                                         | 85                             | <0.01                       | <0.001                             |
| USA (St. Louis, Houston) <sup>a</sup>                                                                  | 5                                         | 182                            | 0.18                        | <0.001                             |
| USA (Norman) <sup>b</sup>                                                                              | 8                                         | 23                             | 0.03                        | <0.005                             |
| Italy <sup>2</sup>                                                                                     | 3                                         | 16                             | 0.02                        | <0.001                             |
| <i>Notes:</i><br><sup>a</sup> obtained from the HMP consortium<br><sup>b</sup> generated in this study |                                           |                                |                             |                                    |

**Supplementary Table 11. Prevalence of *Treponema* OTUs in traditional human gut microbiomes shown in Supplementary Figure 4.**

| OTU-ID    | 338950 | 4307383 | 300310 | 1145921 | 514045 |
|-----------|--------|---------|--------|---------|--------|
| Venezuela | 0      | 9       | 2      | 1       | 0      |
| Malawi    | 3      | 4       | 11     | 5       | 0      |
| Matses    | 12     | 2       | 16     | 0       | 0      |
| Tunapuco  | 16     | 16      | 21     | 9       | 0      |
| Hadza     | 8      | 5       | 0      | 5       | 3      |



**Supplementary Table 12. Summary of assembly and annotation statistics for shotgun metagenomic datasets from the three study populations.**

| Sample | Population | Total Number of Contigs | Total Assembled Length(Mb) | Max Length (Kb) | N50 (bp) | No: of Predicted ORFs | No: of ORFs assigned annotation |
|--------|------------|-------------------------|----------------------------|-----------------|----------|-----------------------|---------------------------------|
| HCO02  | Tunapuco   | 404,654                 | 71.96                      | 27.21           | 162      | 242,193               | 106,505                         |
| HCO07  | Tunapuco   | 510,737                 | 97.57                      | 80.52           | 172      | 305,981               | 112,428                         |
| HCO09  | Tunapuco   | 371,470                 | 81.57                      | 93.79           | 217      | 243,912               | 132,622                         |
| HCO11  | Tunapuco   | 396,800                 | 95.98                      | 155.86          | 245      | 280,276               | 111,390                         |
| HCO12  | Tunapuco   | 445,200                 | 93.37                      | 84.49           | 202      | 292,281               | 92,773                          |
| HCO53  | Tunapuco   | 357,156                 | 77.03                      | 281.85          | 204      | 232,696               | 67,351                          |
| HCO61  | Tunapuco   | 486,418                 | 105.99                     | 148.14          | 206      | 320,571               | 98,294                          |
| HCO64  | Tunapuco   | 484,137                 | 103.40                     | 135.72          | 200      | 309,719               | 144,838                         |
| HCO67  | Tunapuco   | 529,272                 | 107.06                     | 182.78          | 187      | 341,395               | 107,386                         |
| HCO70  | Tunapuco   | 633,315                 | 141.06                     | 221.64          | 215      | 427,081               | 177,979                         |
| HCO72  | Tunapuco   | 457,846                 | 91.16                      | 191.63          | 181      | 286,465               | 132,340                         |
| HCO74  | Tunapuco   | 605,770                 | 115.77                     | 331.31          | 169      | 361,216               | 156,556                         |
| NO01   | Norman     | 195,335                 | 96.19                      | 291.71          | 2306     | 185,241               | 135,274                         |
| NO02   | Norman     | 726,378                 | 234.80                     | 335.14          | 490      | 561,246               | 301,277                         |
| NO03   | Norman     | 713,512                 | 217.19                     | 242.93          | 407      | 534,657               | 304,896                         |
| NO04   | Norman     | 679,179                 | 219.57                     | 203.80          | 474      | 530,098               | 327,599                         |
| NO05   | Norman     | 635,076                 | 204.68                     | 403.22          | 464      | 490,585               | 308,482                         |
| NO06   | Norman     | 552,294                 | 166.77                     | 292.33          | 390      | 420,798               | 285,989                         |
| NO08   | Norman     | 405,452                 | 136.30                     | 440.87          | 569      | 318,936               | 196,124                         |
| NO09   | Norman     | 289,719                 | 116.95                     | 166.73          | 1063     | 246,193               | 167,415                         |
| NO10   | Norman     | 461,035                 | 161.85                     | 291.61          | 597      | 373,220               | 237,805                         |
| NO11   | Norman     | 569,479                 | 200.73                     | 335.61          | 570      | 470,968               | 295,314                         |
| NO12   | Norman     | 341,661                 | 145.00                     | 385.03          | 885      | 303,670               | 214,857                         |
| NO13   | Norman     | 759,031                 | 236.35                     | 312.54          | 447      | 573,248               | 286,617                         |
| NO14   | Norman     | 438,032                 | 159.93                     | 309.86          | 724      | 358,553               | 236,955                         |
| NO15   | Norman     | 719,845                 | 183.60                     | 242.90          | 283      | 495,897               | 269,184                         |
| NO16   | Norman     | 561,215                 | 198.61                     | 290.44          | 596      | 455,184               | 298,938                         |
| NO17   | Norman     | 366,298                 | 138.78                     | 370.56          | 773      | 306,925               | 184,304                         |
| NO18   | Norman     | 367,559                 | 130.62                     | 404.07          | 703      | 293,604               | 178,013                         |
| NO19   | Norman     | 506,152                 | 181.32                     | 342.97          | 757      | 403,950               | 219,860                         |

**Supplementary Table 12 (cont.) Summary of assembly and annotation statistics**

| Sample | Population | Total Number of Contigs | Total Assembled Length(Mb) | Max Length (Kb) | N50 (bp) | No: of Predicted ORFs | No: of ORFs assigned annotation |
|--------|------------|-------------------------|----------------------------|-----------------|----------|-----------------------|---------------------------------|
| NO20   | Norman     | 360,768                 | 148.47                     | 241.60          | 957      | 314,569               | 228,984                         |
| NO21   | Norman     | 624,887                 | 193.12                     | 368.32          | 414      | 476,167               | 305,188                         |
| NO22   | Norman     | 597,606                 | 189.57                     | 346.73          | 455      | 458,080               | 267,487                         |
| NO23   | Norman     | 572,926                 | 176.11                     | 427.24          | 422      | 429,930               | 253,445                         |
| SM01   | Matses     | 561,652                 | 161.82                     | 298.14          | 391      | 386,774               | 167,631                         |
| SM02   | Matses     | 861,183                 | 247.02                     | 218.27          | 381      | 598,049               | 208,211                         |
| SM03   | Matses     | 563,294                 | 141.88                     | 280.12          | 282      | 373,288               | 153,391                         |
| SM05   | Matses     | 171,615                 | 79.91                      | 206.33          | 2479     | 150,206               | 108,096                         |
| SM11   | Matses     | 591,314                 | 168.56                     | 319.37          | 364      | 409,275               | 141,532                         |
| SM18   | Matses     | 631,714                 | 173.19                     | 327.90          | 351      | 425,220               | 169,337                         |
| SM20   | Matses     | 551,078                 | 137.72                     | 318.80          | 273      | 367,662               | 121,729                         |
| SM23   | Matses     | 457,367                 | 136.88                     | 397.45          | 427      | 321,310               | 125,679                         |
| SM24   | Matses     | 258,885                 | 91.84                      | 313.12          | 667      | 199,645               | 124,416                         |
| SM25   | Matses     | 395,693                 | 141.83                     | 241.74          | 682      | 310,408               | 145,983                         |
| SM28   | Matses     | 529,597                 | 132.46                     | 213.05          | 275      | 362,426               | 138,026                         |
| SM29   | Matses     | 760,972                 | 187.63                     | 227.72          | 272      | 497,800               | 160,171                         |
| SM30   | Matses     | 597,215                 | 171.17                     | 183.06          | 361      | 424,930               | 192,656                         |
| SM31   | Matses     | 642,808                 | 155.81                     | 234.60          | 261      | 404,222               | 142,913                         |
| SM32   | Matses     | 586,577                 | 162.59                     | 348.43          | 347      | 398,409               | 118,951                         |
| SM33   | Matses     | 597,589                 | 157.32                     | 263.49          | 320      | 396,365               | 110,563                         |
| SM34   | Matses     | 640,020                 | 173.97                     | 326.77          | 323      | 439,892               | 194,473                         |
| SM37   | Matses     | 652,611                 | 170.36                     | 192.79          | 314      | 434,043               | 169,444                         |
| SM39   | Matses     | 676,159                 | 186.18                     | 285.59          | 351      | 461,872               | 170,336                         |
| SM40   | Matses     | 676,822                 | 182.38                     | 227.43          | 332      | 447,456               | 135,523                         |
| SM41   | Matses     | 475,684                 | 157.21                     | 149.81          | 650      | 344,001               | 151,121                         |
| SM42   | Matses     | 612,538                 | 157.78                     | 337.96          | 295      | 403,194               | 153,405                         |
| SM43   | Matses     | 516,926                 | 151.37                     | 213.54          | 380      | 367,178               | 173,944                         |
| SM44   | Matses     | 540,623                 | 146.99                     | 222.39          | 334      | 362,640               | 144,205                         |

**Supplementary Table 13. Assembly statistics for partial genomes of gut *Treponema* strains reconstructed from Matses shotgun metagenomic data.**

| <i>Treponema</i> Strain               | Strain 1 |        |         |         | Strain 2 |         |
|---------------------------------------|----------|--------|---------|---------|----------|---------|
| Sample                                | SM03     | SM23   | SM28    | SM42    | SM23     | SM42    |
| Total length                          | ~2.46Mb  | ~2.3Mb | ~2.22Mb | ~2.19Mb | ~2.43Mb  | ~2.37Mb |
| Number of contigs                     | 66       | 50     | 49      | 156     | 51       | 29      |
| Length in contigs with marker loci    | 861Kb    | 1.28Mb | 1.15Mb  | 449Kb   | 1Mb      | 1.34Mb  |
| Number of contigs with marker loci    | 11       | 11     | 11      | 16      | 13       | 11      |
| Depth of Coverage                     | ~97      | ~135   | ~513    | ~26     | ~58      | ~331    |
| FCD errors                            | 2        | 3      | 4       | 3       | 1        | 5       |
| Regions of low coverage               | 4        | 1      | 0       | 3952    | 190      | 0       |
| % error free bases                    | ~95%     | ~96%   | ~92%    | ~73%    | ~87%     | ~97%    |
| Number of predicted ORFs              | 2250     | 2087   | 1983    | 1970    | 2073     | 2068    |
| Number of ORFs with function assigned | 1570     | 1498   | 1462    | 1428    | 1475     | 1480    |

## SUPPLEMENTARY REFERENCES

1. Schnorr SL, et al. Gut microbiome of the Hadza hunter-gatherers. *Nature communications* 5, (2014).
2. Yatsunenkov T, et al. Human gut microbiome viewed across age and geography. *Nature* 486, 222-227 (2012).
